# Supplementary material
Source: publisher site journal article supplement (https://www.degruyterbrill.com/publication/isbn/9783486598803/downloadAsset/9783486598803_Leseprobe.pdf)
Supplement: Supplementary file 1 [file 9783486598803_Leseprobe.pdf]

## 2 Einführung: Wer braucht Media-Asset-Management?

Die verzweifelte Suche nach dem passenden Bild, einem Text, einer Grafik, einem Logo oder einem Videoclip gehört heute ebenso zum Alltag eines Schreibtischarbeiters, wie der Fluch über den Tacker, dem die Klammern immer im ungünstigsten Moment ausgehen.

Nun gibt es Heftklammern im Standardformat in jedem Schreibtisch. Das richtige Bild zu finden, scheitert oft schon daran, dass man gar nicht weiß, in wessen Schreibtisch, auf wessen Rechner man überhaupt suchen kann. Vielleicht liegt es ja irgendwo außerhalb, z.B. in der Werbeagentur?

„Media-Asset-Management“ (MAM), „Digital Asset Management“ (DAM), „Media-Warehouse-Systeme“, „Digital Media Management“ (DMM) sind in der Regel synonyme Bezeichnungen für den Ausweg aus diesem Dilemma. Wir einigen uns hier auf die Bezeichnung *Media-Asset-Management* oder kurz MAM.

*Die meisten Dokumente sind unstrukturiert*

Experten schätzen, dass ca. 85 % aller verwalteten Informationen in Unternehmen und Organisationen als unstrukturierte Inhalte, also als Bilder, Dokumente, Videos, Faxe, E-Mails etc., vorliegen. Das Content Volumen wächst jährlich um 200 % (Fulcrum Research 2002). Dokumente, Web-Content und Rich Media repräsentieren den Löwenanteil an unstrukturierter Content in Unternehmen (Gartner Group 2002). Der weltweite MAM-Markt hat in 2002 ein Volumen von ca. 157 Millionen Dollar; für 2007 erwartet man ein Volumen von ca. 2,6 Milliarden Dollar (Frost & Sullivan 2002).

Die Bandbreite der Anwender und ihrer völlig unterschiedlichen Anforderungen machen präzise Marktabschätzungen sehr schwer. Man muss sich nur einmal vergegenwärtigen, wer heute Medien in großen Mengen verwalten muss:

- Rundfunk- und Fernsehsender
- Medienproduzenten
- Internetportale
- Fotografen und Designer
- Fotofachlabore
- Image Services
- Bildagenturen
- Druck- und Reprobetriebe

- Industrieunternehmen
- PR- und Werbeagenturen
- Buch- und Zeitungsverlage
- Museen und Archive
- Forschungseinrichtungen
- Polizei und Behörden
- Katasterämter und Energieversorger
- Kliniken
- Ärzte und andere Freiberufler
- Schulen und Universitäten

Die Mengengerüste und die Verwendungsziele sowie die finanziellen und personellen Möglichkeiten dieser Anwender decken in ihrer Unterschiedlichkeit mehrere Größenordnungen ab. Entsprechend groß ist die Vielfalt der heute angebotenen Softwarelösungen für das Medienmanagement.

## 2.1 Begriffsdefinitionen

Was versteht man unter *Medien* ? Was versteht man unter *Content* ? Was versteht man unter *Asset* ? Diese Begriffe werden unterschiedlich interpretiert und erfordern unsere Definition.

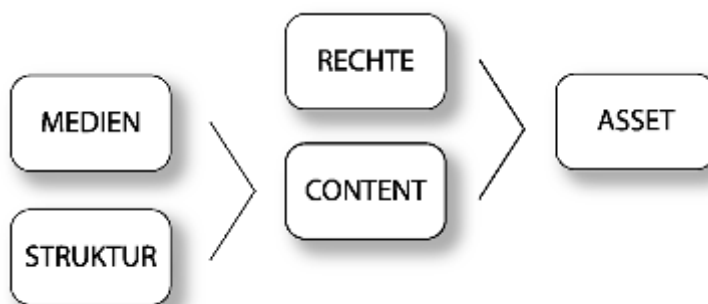

Abb. 2.1 Medien, Content und Asset

### Medien

*Medien* sind unstrukturierter Content. Sie dienen der Kommunikation und fungieren als Darstellungsform von Informationen.

Grundlegende Medientypen:

- Text, Dokument, z.B. ASCII, XML, PDF, WinWord
- Bild, z.B. EPS, TIF, JPEG, GIF, PSD
- Video, z.B. MPEG, QuickTime, avi, real media
- Audio, z.B. mp3, wav, real media
- Farbprofile, z.B. ICC-Profile
- Schriftfonts, z.B. Helvetica, Times Roman
- Zeichnungen/Grafiken, z.B. Adobe Illustrator
- Internet-Objekte, z.B. HTML, Flash

(Siehe dazu das Kapitel über Datenformate)

### Medien-Kategorien

*Medien-Kategorien* sind zum Beispiel Internet, Zeitung, Hörfunk und Fernsehen. Die eindeutige Trennung wird zunehmend unschärfer, da heute z.B. Zeitungsverlage auch Informationen über das Internet publizieren.

### Rich Media

Als *Rich Media* bezeichnet man zeitkorrelierten Content: Video, Audio, Film, Animation. Für das MAM stellt sich bei Rich Media die Frage der Repräsentation: ein Standbild lässt sich auch als Thumbnail noch auf einen Blick erkennen. Aber wie verdichtet man eine Oper?

### Konvergenz der Medien

Wenn wir von der *Konvergenz der Medien* sprechen, meinen wir das Zusammenfließen von Medien. Typisches Beispiel sind das Zusammenwachsen von TV-Gerät, Internet und Telefon, sowie das Zusammenwachsen von Mobiltelefon, Walkman, Kamera und PDA.

### Konvergenz der Medien-Industrie

Mit der *Konvergenz der Medien-Industrie* meinen wir das Zusammenwachsen der unterschiedlichen Industrie-Bereiche: Druckerei, Verlage, Rundfunk- und Fernsehanstalten, Repro- und Satz-Betriebe, Foto-Labore etc.

Daraus ergeben sich neue Anforderungen für die Medien-Industrie:

- unter dem Formaspekt:  
Qualifizierter Umgang mit den Darstellungsformen von Medien; insbesondere hinsichtlich Gestaltung und Bearbeitung
- unter dem Inhaltsaspekt:  
Qualifizierter Umgang mit dem Content; dazu zählt die Gestaltung der Inhalte je nach Verwendung und Medien-Kategorie.

### Struktur

Als *Struktur* bezeichnet man den gegliederten Aufbau oder die Anordnung von Teilen eines Ganzen zueinander.

**Content**

*Content* (engl. Inhalt) bezeichnet Informationen in strukturierter, schwach strukturierter (semi-strukturierter) und unstrukturierter Form, die in elektronischen Systemen zur Nutzung bereitgestellt werden. Die Informationsobjekte selbst umfassen Inhalt, Struktur und Metadaten.

**Strukturierungsgrad von Content**

*Voll strukturierter Content* sind Daten, die in einer standardisierten Struktur aus datenbankgestützten Systemen bereitgestellt werden, z.B. formatierte Datensätze oder Tabellen.

*Schwach strukturierter Content* umfasst Informationen und Dokumente, die nur zum Teil Struktur und Metadaten mit sich tragen, jedoch nicht standardisiert sind. Das gilt beispielsweise für Textverarbeitungsdateien.

*Unstrukturierter Content* sind beliebige Informationsobjekte, deren Inhalt nicht automatisiert erschlossen werden kann, die keine Trennung von Inhalt, Struktur und Metadaten aufweisen oder ohne Struktur und Metadaten vorliegen (z.B. Bilder, Video, Sprache, Fax)

## 2.2 Was ist ein Media Asset?

Mit dem Begriff *Asset* bezeichnen wir *verwertbaren* Content unter Berücksichtigung der existierenden Rechtsverhältnisse. Ein Asset ist eigentlich ein Organisationsprinzip. Es besteht aus dem eigentlichen Inhalt, den Metadaten, die diesen Inhalt beschreiben, Kategorien und Klassifizierungen, die seinen Platz in der Welt bestimmen und Verknüpfungen, die seine Beziehungen zur Welt darstellen.

Media Assets sind alle Formen visueller Information, angefangen von der handgeschriebenen Urkunde mit kaiserlichem Siegel aus dem 12. Jahrhundert über die Rede des Friedenspreisträgers Bloch von 1967 bis zum TV-Werbespot von Coca-Cola. Die digitale Form kann also keineswegs vorausgesetzt werden, ist aber für die Integration in ein MAM-System in der Regel sinnvoll, wenn nicht gar notwendig. Die Integration analoger Medienformate, wie z.B. magnetische Audio- und Videoaufzeichnungen, Filme, Dias, Bücher und andere Papierdokumente, gehört zu den technologisch anspruchsvollsten und wegen der Vergänglichkeit dieser Medien, auch zu den drängendsten Aufgaben des Media-Asset-Managements!

„Asset Management“ steht in der Finanzwelt für die Verwaltung von Vermögenswerten. Auch Media Assets sind Vermögenswerte: sie besitzen sogar so etwas wie Liquidität: je liquider sie sind, desto leichter und schneller können sie den Besitzer wechseln.

Die Media Assets in einem Unternehmen sind es durchaus wert, bilanziert zu werden: ihr Wert kann in die Millionen gehen. Das Media-Asset-Management sorgt dafür, dass dieser Wert nicht nur erhalten bleibt, sondern auch angemessen Zinsen abwirft. Der Zeitaufwand für die Erstellung von Präsentationen, Fotos, Grafiken oder Videos stellt ja nur den Einstandspreis dar. Denn auch der Kurswert von Media Assets steigt mit jeder Wiederverwendung oder einer zusätzlichen Verwertung.

Noch viel höher als die unerkannten Kosten fällt der entgangene Gewinn aus, den ein Unternehmen bei optimaler Nutzung seiner Media Assets in der Marktkommunikation erzielen könnte. Wenn etwa ein Unternehmen wie Daimler-Chrysler auf einer internationalen Pressekonferenz auf einmal ein fünffaches an (digitalen) Bildern auf CD-R an die Journalisten zu einem Bruchteil (20 %) der Kosten verteilen kann, die früher die Papierabzüge und Diaduplikate einiger weniger Bilder gekostet haben, dann ist der Einspareffekt Nebensache.

## 2.3 Historie und Varianten von Medien-Datenbanken

Im Umfeld heutiger MAM-Lösungen treten folgende Begriffe häufig auf:

### 2.3.1 Bild-Datenbank, Image-Management-System (IMS)

Die *Bilddatenbank* stellt die einfachste Ausprägung einer Medien-Datenbank dar und dient der Verwaltung von Bildern, Fotos, Grafiken etc.

### 2.3.2 Dokumenten-Management-System

*Dokumenten-Management-Systeme* (DMS) stellen ebenfalls eine der frühesten Ausprägungen einer Medien-Datenbank dar und dienen der Verwaltung von Dokumenten. Dabei wird auch der Bereich des Scannens und der Übernahme der gescannten Dokumente in lesbare Informationen zum DM-System hinzugezählt. Für ein DMS ist deshalb die Filterung typisch, die bei der digitalen Erfassung stattfindet: visuelle Ausprägungen wie Farbe, Detail- und Papierstruktur gelten weitgehend als irrelevant und werden nicht erfasst. Sie würden den Erfassungsprozess und den Workflow nur unnötig belasten. Entscheidend ist bei DMS nur die Lesbarkeit der Information.

### 2.3.3 Produktions-Datenbank

*Produktions-Datenbanken* dienen der Verwaltung von digitalen Produktionsaufträgen und den ihnen zugrunde liegenden Medien. Wenn das Produkt selbst ein visuelles Medium ist (z.B. eine Zeitschrift, eine Anzeige), sind PMS auch MAM-Systeme.

### 2.3.4 Web-Content-Management-System

Ein *Web-Content-Management-System* (WCMS) ist ein Management-System zur Administration von größeren Web-Sites. Hier stehen insbesondere die komfortable redaktionelle Bearbeitung von Web-Inhalten und die Verwaltung der Internet-spezifisch aufbereiteten Medien im Vordergrund. Weitere Eigenschaften und Anforderungen werden in der späteren Betrachtung aufgeführt.

### 2.3.5 Content-Management-System

Ursprünglich gleichgesetzt mit WCMS, dient ein *Content-Management-System* (CMS) heute zur Verwaltung aller Medien/Content und versucht alle Ausgabekanäle abzudecken. Häufig integriert ein CMS ergänzende DMS-Funktionalitäten und setzt direkt auf ein MAM-System auf. Zusätzlich bietet ein CMS auch Funktionen zur Erstellung von Inhalten und zur automatisierten Präsentation und Distribution von Inhalten. Mehr dazu später.

### 2.3.6 Redaktionssystem

*Redaktionssysteme* sind Workflow-orientierte CMS, die an die spezifischen Anforderungen der Zeitungsproduktion angepasst sind. Da Verlage zunehmend crossmedial produzieren, nähern sich Redaktions- und CM-Systeme immer weiter an.

### 2.3.7 Enterprise-Content-Management-System

*Enterprise-Content-Management-Systeme* (ECMS) repräsentieren eine jüngere Strömung, die alle bestehenden Systeme integrieren will. Hierzu werden Funktionen aus der traditionellen Archivwelt, dem Dokumenten- und dem Workflow-Management an die Anforderungen eines Content Management-Systems angepasst. Damit wird die Möglichkeit geschaffen, Web-basierte Komponenten mit herkömmlichen Produkten zu verbinden. Mehr dazu später.

### 2.3.8 Knowledge-Management-System

*Knowledge-Management-Systeme* (KMS) dienen zur intelligenten Verknüpfung von Informationen mit vorhandenen Erfahrungen und Kenntnissen und somit der Verwaltung von Wissensinhalten. Das Wissensmanagement gilt heute als wichtigste Schlüsseltechnologie des Informationszeitalters: Die Zukunftsfähigkeit von Organisationen jeder Art und Größenordnung hängt davon ab, wie gut sie ihre vorhandenen Wissensressourcen nutzen können.

Die Abgrenzung zwischen Wissens-, Content- und Medien-Management-Systemen ist schwierig, wenn die Wissensinhalte multimedial repräsentiert sind.

### 2.3.9 Fazit

Grundlage all dieser Systeme ist die Verwaltung von Medien und Content. Sie bedingen in der Regel den Einsatz eines MAM-Systems.

Eine klare Abgrenzung dieser Systeme untereinander wird durch übergreifende Funktionalitäten zunehmend schwieriger. So werden in Zukunft obige Begriffe, zumindest in Ihren funktionellen Ausprägungen zusammenwachsen. Da der Workflow-Aspekt in allen Bereichen immer wichtiger wird, könnte man zusammenfassend auch von *Medien- und Content-Logistik-Systemen* sprechen.
